# Supplementary material for: Vertical variability of aerosol properties and trace gases over a remote marine region: a case study over Bermuda
Source: Copernicus journal article supplement (doi:10.5194/acp-24-9197-2024), 2024-08-23
Supplement: Supplementary file 1 [file acp-24-9197-2024-supplement.pdf]

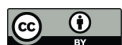

*Supplement of*

## **Vertical variability of aerosol properties and trace gases over a remote marine region: a case study over Bermuda**

**Taiwo Ajayi et al.**

*Correspondence to:* Armin Sorooshian (armin@arizona.edu)

The copyright of individual parts of the supplement might differ from the article licence.

**Table S1.** Summary of past studies relevant to aerosol particles, trace gases, and trajectory analysis for the Bermuda region.

| Reference                  | Key Notes                                                                                                                                                                                 | Study Platform    |
|----------------------------|-------------------------------------------------------------------------------------------------------------------------------------------------------------------------------------------|-------------------|
| Ahmad et al., 2010         | Examined the new aerosol model for retrieval of atmospheric optical properties from SeaWiFS and MODIS sensor                                                                              | Surface/Modeling  |
| Altieri et al., 2013       | Explored nitrate sources in ocean rainwater                                                                                                                                               | Surface           |
| Altieri et al., 2014       | Investigated ammonium sources and N deposition in the ocean using rainwater samples with air mass history                                                                                 | Surface           |
| Altieri et al., 2016       | Analyzed rainwater and aerosol organic N concentrations and composition sources on Bermuda Island                                                                                         | Surface           |
| Aldhaif et al., 2021       | Investigated Bermuda aerosol climatology and cloud properties                                                                                                                             | Surface/Satellite |
| Andersson et al., 2013     | Studied seawater CO <sub>2</sub> dynamics and sea-air CO <sub>2</sub> gas exchange rates during wintertime North Atlantic Ocean Eighteen Degree Water formation                           | Ship              |
| Anderson et al., 1993      | Assessed continental outflow's impact on western Atlantic ozone and small aerosol budgets                                                                                                 | Aircraft          |
| Anderson et al., 1996      | Characterization of Bermuda tropospheric aerosol in fine fraction samples (<2 μm) using single particle and bulk aerosol analysis                                                         | Surface           |
| Arimoto et al., 1992, 1995 | Investigated anthropogenic and natural sources' contributions to non-sea salt sulfate budgets in aerosol particles were assessed using trace element data                                 | Surface           |
| Arimoto et al., 1997       | Examined the link between dust mass-particle size distributions (MSDs) and atmospheric dust loadings using size-separated mineral aerosol samples                                         | Surface           |
| Arimoto et al., 1999       | Analyzed Be and Pb activity in daily north Atlantic aerosol samples and meteorological data to determine how particle composition affects transport pathways and precipitation scavenging | Surface           |
| Arimoto et al., 2003       | Analyzed trace element recycling on atmospheric sea salt in Bermuda using aerosol particle data for Al, Fe, Na, Sb, Se V, and Zn and parameterized dry deposition velocities              | Surface           |
| Aryal et al., 2014         | Compared surface and column optical properties                                                                                                                                            | Surface/Column    |
| Baker et al., 2017         | Assess models and observations estimate of oceanic particulate dry nitrogen deposition                                                                                                    | Ship/Modeling     |
| Braun et al., 2021         | Study examines atmospheric features of International Satellite Cloud Climatology Project weather states (WSs) across the Western North Atlantic Ocean                                     | Satellite         |
| Cornell et al., 1995       | Examined atmospheric emissions of dissolved organic nitrogen to the oceans                                                                                                                | Surface           |
| Cornell et al., 1998       | Examined urea in rainwater and atmospheric aerosol                                                                                                                                        | Surface           |
| Dadashazar et al., 2021    | Evaluate aerosol mass concentrations and volume size distributions' seasonal sensitivity to accumulated precipitation along trajectories                                                  | Surface/Modeling  |
| Harriss et al., 1984       | Particulate transport via the atmosphere from North America to the North Atlantic Ocean                                                                                                   | Aircraft          |
| Hastie et al., 1988        | Examined nitrogen and sulfur over the western Atlantic Ocean                                                                                                                              | Surface/Aircraft  |

|                         |                                                                                                                                                        |                    |
|-------------------------|--------------------------------------------------------------------------------------------------------------------------------------------------------|--------------------|
| Hegarty et al., 2010    | Studied winter and summer continental influences on tropospheric O <sub>3</sub> and CO in the WNAO observed by TES                                     | Satellite          |
| Horvath et al., 1990    | Determined the atmospheric aerosol's coarse mode using forward-scattering spectrometer probe data                                                      | Aircraft           |
| Jickells et al., 1998   | Investigated air-borne dust fluxes to deep-water sediment trap in the Sargasso Sea                                                                     | Aircraft           |
| Kawamura et al., 2017   | Examined OC/EC, low molecular weight dicarboxylic acids, lipid class chemicals, sugars, and secondary organic aerosol (SOA) tracers in aerosol samples | Ship               |
| Keene et al., 1986      | Investigated sea-salt corrections and interpretation of constituent ratios in marine precipitation                                                     | Surface            |
| Keene et al., 2007      | Examined the physical and chemical properties of newly created aerosols from bubble bursts at a modeled air-sea interface                              | Surface/Laboratory |
| Keene et al., 2014      | Investigated long-term trends in aerosol and precipitation composition across the WNAO at Bermuda                                                      | Surface            |
| Kim et al., 1990        | Investigated volume/surface area size distribution of marine aerosols during the GCE/CASE/WATOX.                                                       | Aircraft           |
| Lin et al., 2012        | Sulphur isotope data was used to evaluate the importance of sulfate sources in the Atlantic Ocean                                                      | Ship               |
| Mackey et al., 2012     | Studied how atmospheric metal deposition affects open-ocean and coastal phytoplankton ecosystems                                                       | Surface            |
| Merrill et al., 1996    | Meteorological analysis of tropospheric ozone profiles in Bermuda                                                                                      | Ozonesondes        |
| Miller & Harris, 1985   | Examined Bermuda's flow climatology and its impact on long-range transport                                                                             | Aircraft           |
| Milne et al., 2000      | Export of ozone precursors to Bermuda                                                                                                                  | Aircraft           |
| Moody et al., 1995      | Assessed Bermuda transport climatology of tropospheric ozone                                                                                           | Surface            |
| Moody & Galloway, 1988  | Examined the impact of various atmospheric flow patterns on precipitation composition in Bermuda                                                       | Surface            |
| Moody et al., 1996      | Investigated the large-scale view of O <sub>3</sub> transport over WNAO                                                                                | Surface/Ozonesonde |
| Moody et al., 2014      | Studied flow climatology for physicochemical parameters of nominal super- and sub- $\mu\text{m}$ aerosol in Bermuda                                    | Surface            |
| Muhs et al., 2012       | Studied the importance of African dust transport and deposition in Bermuda                                                                             | Surface            |
| Oltmans & Levy, 1992    | Examined the seasonal cycle of surface ozone over the western North Atlantic                                                                           | Surface            |
| Oltmans et al., 2006    | Investigated the long-term changes in tropospheric ozone                                                                                               | Surface            |
| Oltmans et al., 2013    | Investigated the recent tropospheric ozone changes                                                                                                     | Satellite/Surface  |
| Parrish et al., 2016    | Examined seasonal cycles of O <sub>3</sub> in the marine boundary layer                                                                                | Surface/Modeling   |
| PéTron et al., 2002     | Modeled carbon monoxide surface emissions inversely using Climate Monitoring and Diagnostics Laboratory network observation                            | Modeling           |
| Piotrowicz et al., 1990 | Observation of ozone and carbon monoxide over the north Atlantic during a boreal summer                                                                | Ship               |
| Prados et al., 1999     | Investigated ozone and pollutant transport from North America to the North Atlantic Ocean during the 1996 AEROCE experiment                            | Aircraft           |

|                            |                                                                                                                                                             |                  |
|----------------------------|-------------------------------------------------------------------------------------------------------------------------------------------------------------|------------------|
| Ray et al., 1990           | Investigated marine troposphere H <sub>2</sub> O <sub>2</sub> and O <sub>3</sub> over the western Atlantic Ocean                                            | Aircraft         |
| Savoie et al., 2002        | Examined marine biogenic and anthropogenic contribution to non-sea-salt sulfate in the North Atlantic Ocean's MBL                                           | Surface          |
| Saikawa et al., 2014       | Examined the global and regional emissions estimates for N <sub>2</sub> O                                                                                   | Surface/Modeling |
| Sholkovitz & Sedwick, 2006 | Analyzed aerosol samples for iron and soluble sodium (as a proxy for sea salt)                                                                              | Bouy/Surface     |
| Sholkovitz et al., 2009    | Created an empirical approach to estimate aerosol iron solubility using bulk Fe, V, and Al concentrations                                                   | Ship             |
| Sievering et al., 1990     | Examined size distributions and statistical analysis of nitrate, excess sulfate, and chloride deficiency in the marine boundary layer during GCE/CASE/WATOX | Ship             |
| Sievering et al., 1991     | Investigated the role of aerosol water content and size distribution on heterogeneous sulfur conversion in sea-salt aerosol particles                       | Ship             |
| Smirnov et al., 1998       | Examined optical properties of Saharan dust during ACE 2                                                                                                    | Surface          |
| Smirnov et al., 2000       | Measured and analyzed atmospheric optical parameters on U.S. Atlantic coast sites, ships, and Bermuda during TARFOX                                         | Surface          |
| Smirnov et al., 2003       | Developed a model for maritime aerosols using AERONET                                                                                                       | Surface/Modeling |
| Tanré et al., 1999         | Retrieved aerosol optical thickness and size distribution over ocean using MODIS airborne simulator during TARFOX                                           | Satellite        |
| Thompson et al., 2014      | Time-dependent Bayesian inversion technique was used to estimate N <sub>2</sub> O surface fluxes from 1999 to 2009                                          | Surface/ship     |
| Todd et al., 2003          | Examined the impact of wet deposition on atmospheric optical properties in Bermuda and Barbados                                                             | Surface          |
| Tomza et al., 2001         | Examined color-related differences in the chemical composition                                                                                              | Surface          |
| Turekian et al., 2001      | Used stable sulfur isotopes to differentiate sources of size-resolved sulfate in polluted marine air in Bermuda during spring                               | Surface          |
| Turekian et al., 2003      | Analyzed Bermuda's size-segregated aerosols for organic carbon, oxalate, and stable isotope compositions to understand chemical processes and their sources | Surface          |
| Volpe & Spivack, 1994      | Researched the stable chlorine isotopic composition of western Atlantic Ocean marine aerosol particles                                                      | Surface          |
| Witek et al., 2013         | Conducted measurements of ocean aerosol optical depths using MISR retrievals and collocated MAN and AERONET measurements                                    | Surface          |
| Wolff et al., 1986         | Investigated SO <sub>x</sub> , NO <sub>x</sub> , and aerosol species measurement in Bermuda                                                                 | Surface          |

**Table S2.** Summary of abbreviations and acronyms used in the paper.

|                   |                                                                             |
|-------------------|-----------------------------------------------------------------------------|
| ACE-ENA           | Aerosol and Cloud Experiment in the Eastern North Atlantic                  |
| ACTIVATE          | Aerosol Cloud meTeorology Interactions oVer the western ATlantic Experiment |
| AMS               | Aerosol Mass Spectrometer                                                   |
| APT               | Accumulated Precipitation along Trajectories                                |
| AVAPS             | Airborne Vertical Atmospheric Profiling System                              |
| CALIOP            | Cloud-Aerosol Lidar with Orthogonal Polarization                            |
| CALIPSO           | Cloud-Aerosol Lidar and Infrared Pathfinder Satellite Observations          |
| CCN               | Cloud Condensation Nuclei                                                   |
| DLH               | Diode Laser Hygrometer                                                      |
| DMA               | Differential Mobility Analyzer                                              |
| DMS               | Dimethylsulfide                                                             |
| FCDP              | Fast Cloud Droplet Probe                                                    |
| f(RH)             | Hygroscopicity Parameter                                                    |
| FT                | Free Troposphere                                                            |
| GDAS              | Global Data Assimilation System                                             |
| HSRL-2            | High Spectral Resolution Lidar – Generation 2                               |
| HYSPLIT           | Hybrid Single-Particle Lagrangian Integrated Trajectory model               |
| LaRC              | NASA Langley Research Center                                                |
| LAS               | Laser Aerosol Spectrometer                                                  |
| LWC               | Liquid Water Content                                                        |
| MBLH              | Marine Boundary Layer Height                                                |
| MF <sub>org</sub> | Mass Fraction of Organics From AMS                                          |
| MLH               | Mixed Layer Height                                                          |
| NASA              | National Aeronautics and Space Administration                               |
| NCAR              | National Center for Atmospheric Research                                    |
| NOAA              | National Oceanic and Atmospheric Administration                             |
| NSS               | Non-Sea salt                                                                |
| PILS              | Particle into Liquid Sampler                                                |
| RF                | Research Flight                                                             |
| RH                | Relative Humidity                                                           |
| SMPS              | Scanning Mobility Particle Sizer                                            |
| UTC               | Coordinated Universal Time                                                  |
| VOC               | Volatile Organic Compounds                                                  |

**Table S3.** Summary of median aerosol volume concentration statistics for different diameter size ranges for the three major air mass types.

| <1 km                  | V ( $\mu\text{m}^3 \text{cm}^{-3}$ ) |                       |                     |                  |
|------------------------|--------------------------------------|-----------------------|---------------------|------------------|
|                        | <100 nm                              | 0.1 – 1 $\mu\text{m}$ | 1 – 5 $\mu\text{m}$ | >3 $\mu\text{m}$ |
| North America          | 0.08                                 | 1.36                  | 3.33                | 5.17             |
| Ocean                  | 0.02                                 | 1.20                  | 0.71                | 4.91             |
| Caribbean/North Africa | 0.02                                 | 1.41                  | 6.15                | 5.42             |
| 1 – 3.5 km             |                                      |                       |                     |                  |
| North America          | 0.05                                 | 0.42                  | 0.00                | 0.59             |
| Ocean                  | 0.02                                 | 0.60                  | 0.00                | 1.60             |
| Caribbean/North Africa | 0.03                                 | 0.68                  | 0.54                | 2.99             |

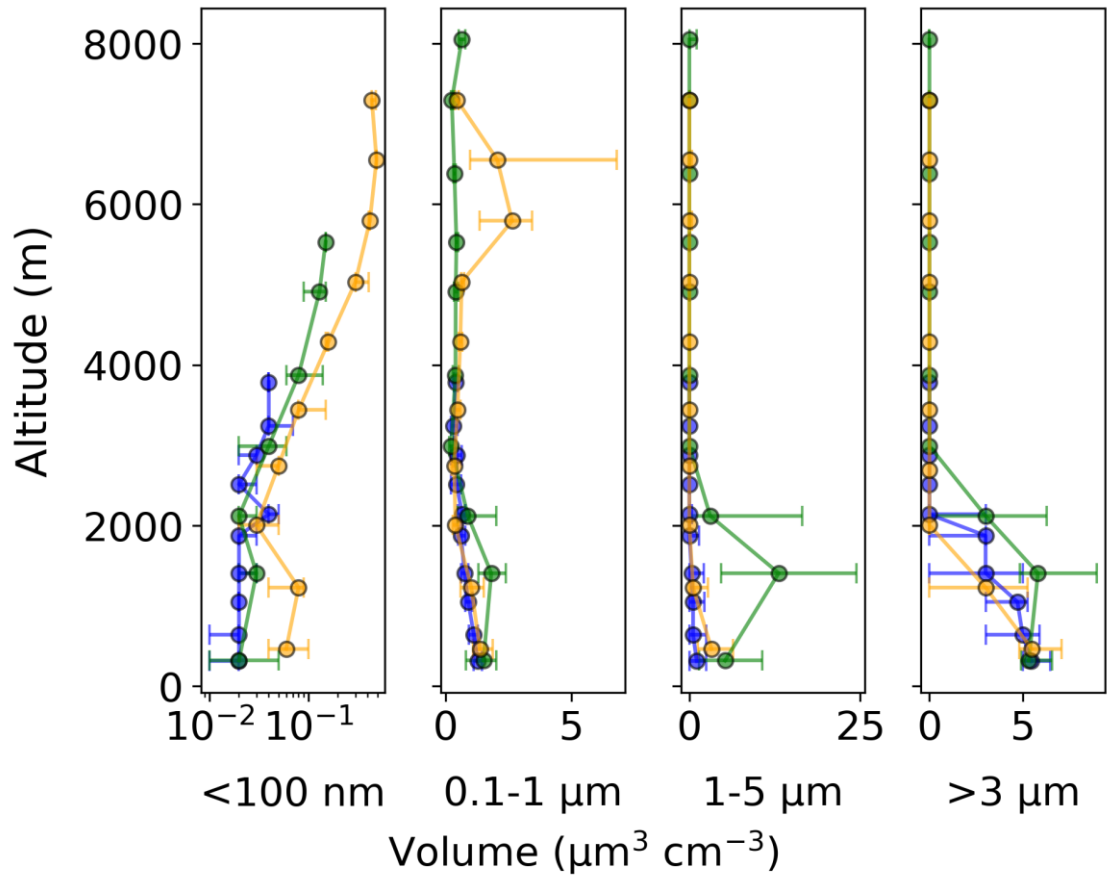

Figure S1: Vertical distribution of aerosol volume concentration for flight data grouped into similar air mass source categories (Orange = North America; blue = Ocean; green = Caribbean/North Africa). Markers are median values and whiskers are 25<sup>th</sup>/75<sup>th</sup> percentiles.

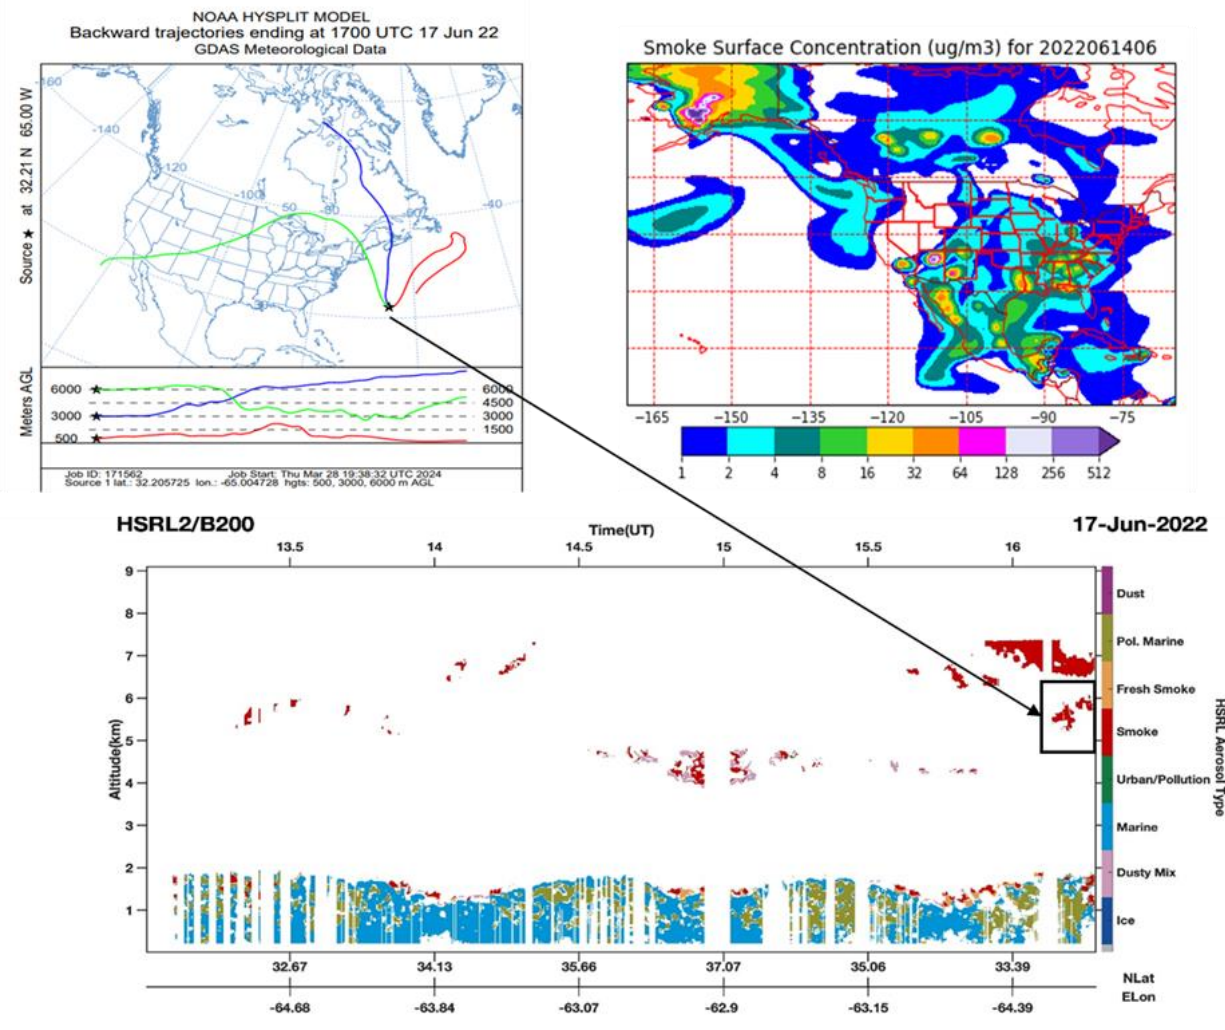

Figure S2: A visual summary of (a) 5-day HYSPLIT back-trajectory results ending at the point of the Falcon spiral on 17 June 2022 (RF 178), (b) a spatial distribution of smoke surface concentrations across North America from NAAPS (13 June chosen for display to account for transport time to Bermuda on 17 June), and (c) HSRL-2 aerosol type vertical distribution pertaining to 17 June 2022 where elevated aerosol extinction was observed around 5-6 km altitude (Fig. 6a). Most relevant in panel (a) is the green trajectory ending at 6 km over Bermuda where data suggest there was a smoke layer.



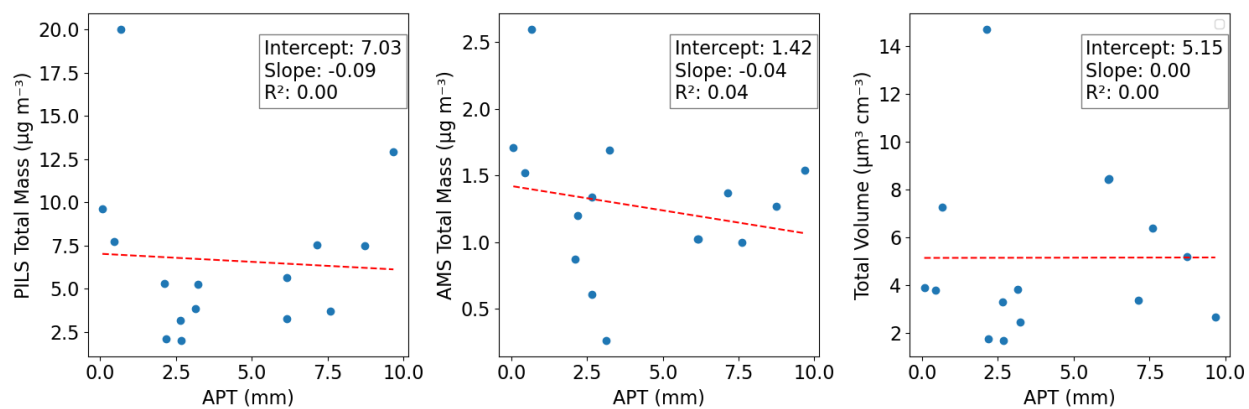

**Figure S3: Scatterplots of PILS total mass, AMS total mass, and total volume concentration ( $D_p$ : 0.01-5  $\mu\text{m}$ ) versus APT for all spirals, with each marker corresponding to the mean value for a given spiral. The linear best-fit line is in red with relevant fit metrics in respective legends.**

## References

- Ahmad, Z., Franz, B. A., McClain, C. R., Kwiatkowska, E. J., Werdell, J., Shettle, E. P., and Holben, B. N.: New aerosol models for the retrieval of aerosol optical thickness and normalized water-leaving radiances from the SeaWiFS and MODIS sensors over coastal regions and open oceans, *Appl. Opt.*, **AO**, *49*, 5545–5560, <https://doi.org/10.1364/AO.49.005545>, 2010.
- Aldhaif, A. M., Lopez, D. H., Dadashazar, H., Painemal, D., Peters, A. J., and Sorooshian, A.: An Aerosol Climatology and Implications for Clouds at a Remote Marine Site: Case Study Over Bermuda, *Journal of Geophysical Research: Atmospheres*, **126**, e2020JD034038, <https://doi.org/10.1029/2020JD034038>, 2021.
- Altieri, K. E., Hastings, M. G., Gobel, A. R., Peters, A. J., and Sigman, D. M.: Isotopic composition of rainwater nitrate at Bermuda: The influence of air mass source and chemistry in the marine boundary layer, *Journal of Geophysical Research: Atmospheres*, **118**, 11,304–11,316, <https://doi.org/10.1002/jgrd.50829>, 2013.
- Altieri, K. E., Hastings, M. G., Peters, A. J., Oleynik, S., and Sigman, D. M.: Isotopic evidence for a marine ammonium source in rainwater at Bermuda, *Global Biogeochemical Cycles*, **28**, 1066–1080, <https://doi.org/10.1002/2014GB004809>, 2014.
- Altieri, K. E., Fawcett, S. E., Peters, A. J., Sigman, D. M., and Hastings, M. G.: Marine biogenic source of atmospheric organic nitrogen in the subtropical North Atlantic, *Proceedings of the National Academy of Sciences*, **113**, 925–930, <https://doi.org/10.1073/pnas.1516847113>, 2016.
- Anderson, B. E., Gregory, G. L., Barrick, J. D. W., Collins Jr., J. E., Sachse, G. W., Bagwell, D., Shipham, M. C., Bradshaw, J. D., and Sandholm, S. T.: The impact of U.S. continental outflow on ozone and aerosol distributions over the western Atlantic, *Journal of Geophysical Research: Atmospheres*, **98**, 23477–23489, <https://doi.org/10.1029/93JD01208>, 1993.
- Anderson, J. R., Buseck, P. R., Patterson, T. L., and Arimoto, R.: Characterization of the Bermuda tropospheric aerosol by combined individual-particle and bulk-aerosol analysis, *Atmospheric Environment*, **30**, 319–338, [https://doi.org/10.1016/1352-2310\(95\)00170-4](https://doi.org/10.1016/1352-2310(95)00170-4), 1996.
- Andersson, A. J., Krug, L. A., Bates, N. R., and Doney, S. C.: Sea–air CO<sub>2</sub> flux in the North Atlantic subtropical gyre: Role and influence of Sub-Tropical Mode Water formation, *Deep Sea Research Part II: Topical Studies in Oceanography*, **91**, 57–70, <https://doi.org/10.1016/j.dsr2.2013.02.022>, 2013.
- Arimoto, R., Duce, R. A., Savoie, D. L., and Prospero, J. M.: Trace elements in aerosol particles from Bermuda and Barbados: Concentrations, sources and relationships to aerosol sulfate, *J Atmos Chem*, **14**, 439–457, <https://doi.org/10.1007/BF00115250>, 1992.
- Arimoto, R., Duce, R. A., Ray, B. J., Ellis Jr., W. G., Cullen, J. D., and Merrill, J. T.: Trace elements in the atmosphere over the North Atlantic, *Journal of Geophysical Research: Atmospheres*, **100**, 1199–1213, <https://doi.org/10.1029/94JD02618>, 1995.
- Arimoto, R., Ray, B. J., Lewis, N. F., Tomza, U., and Duce, R. A.: Mass-particle size distributions of atmospheric dust and the dry deposition of dust to the remote ocean, *Journal of Geophysical Research: Atmospheres*, **102**, 15867–15874, <https://doi.org/10.1029/97JD00796>, 1997.
- Arimoto, R., Snow, J. A., Graustein, W. C., Moody, J. L., Ray, B. J., Duce, R. A., Turekian, K. K., and Maring, H. B.: Influences of atmospheric transport pathways on radionuclide activities in aerosol particles from over the North Atlantic, *Journal of Geophysical Research: Atmospheres*, **104**, 21301–21316, <https://doi.org/10.1029/1999JD900356>, 1999.
- Arimoto, R., Duce, R. A., Ray, B. J., and Tomza, U.: Dry deposition of trace elements to the western North Atlantic, *Global Biogeochemical Cycles*, **17**, <https://doi.org/10.1029/2001GB001406>, 2003.
- Aryal, R. P., Voss, K. J., Terman, P. A., Keene, W. C., Moody, J. L., Welton, E. J., and Holben, B. N.: Comparison of surface and column measurements of aerosol scattering properties over the western North Atlantic Ocean at Bermuda, *Atmospheric Chemistry and Physics*, **14**, 7617–7629, <https://doi.org/10.5194/acp-14-7617-2014>, 2014.
- Baker, A. R., Kanakidou, M., Altieri, K. E., Daskalakis, N., Okin, G. S., Myriokefalitakis, S., Dentener, F., Uematsu, M., Sarin, M. M., Duce, R. A., Galloway, J. N., Keene, W. C., Singh, A., Zamora, L., Lamarque, J.-F., Hsu, S.-C., Rohekar, S. S., and Prospero, J. M.: Observation- and model-based estimates of particulate dry nitrogen deposition to the oceans, *Atmospheric Chemistry and Physics*, **17**, 8189–8210, <https://doi.org/10.5194/acp-17-8189-2017>, 2017.

- Braun, R. A., McComiskey, A., Tselioudis, G., Tropf, D., and Sorooshian, A.: Cloud, Aerosol, and Radiative Properties Over the Western North Atlantic Ocean, *Journal of Geophysical Research: Atmospheres*, 126, e2020JD034113, <https://doi.org/10.1029/2020JD034113>, 2021.
- Cornell, S., Randell, A., and Jickells, T.: Atmospheric inputs of dissolved organic nitrogen to the oceans, *Nature*, 376, 243–246, <https://doi.org/10.1038/376243a0>, 1995.
- Cornell, S. E., Jickells, T. D., and Thornton, C. A.: Urea in rainwater and atmospheric aerosol, *Atmospheric Environment*, 32, 1903–1910, [https://doi.org/10.1016/S1352-2310\(97\)00487-1](https://doi.org/10.1016/S1352-2310(97)00487-1), 1998.
- Dadashazar, H., Alipanah, M., Hilario, M. R. A., Crosbie, E., Kirschler, S., Liu, H., Moore, R. H., Peters, A. J., Scarino, A. J., Shook, M., Thornhill, K. L., Voigt, C., Wang, H., Winstead, E., Zhang, B., Ziemba, L., and Sorooshian, A.: Aerosol responses to precipitation along North American air trajectories arriving at Bermuda, *Atmospheric Chemistry and Physics*, 21, 16121–16141, <https://doi.org/10.5194/acp-21-16121-2021>, 2021.
- Harriss, R. C., Browell, E. V., Sebacher, D. I., Gregory, G. L., Hinton, R. R., Beck, S. M., McDougal, D. S., and Shipley, S. T.: Atmospheric transport of pollutants from North America to the North Atlantic Ocean, *Nature*, 308, 722–724, <https://doi.org/10.1038/308722a0>, 1984.
- Hastie, D. R., Schiff, H. I., Whelpdale, D. M., Peterson, R. E., Zoller, W. H., and Anderson, D. L.: Nitrogen and sulphur over the Western Atlantic Ocean, *Atmospheric Environment* (1967), 22, 2381–2391, [https://doi.org/10.1016/0004-6981\(88\)90470-2](https://doi.org/10.1016/0004-6981(88)90470-2), 1988.
- Hegarty, J., Mao, H., and Talbot, R.: Winter- and summertime continental influences on tropospheric O<sub>3</sub> and CO observed by TES over the western North Atlantic Ocean, *Atmospheric Chemistry and Physics*, 10, 3723–3741, <https://doi.org/10.5194/acp-10-3723-2010>, 2010.
- Horvath, H., Gunter, R. L., and Wilkison, S. W.: Determination of the Coarse Mode of the Atmospheric Aerosol Using Data from a Forward-Scattering Spectrometer Probe, *Aerosol Science and Technology*, 12, 964–980, <https://doi.org/10.1080/02786829008959407>, 1990.
- Jickells, T. D., Dorling, S., Deuser, W. G., Church, T. M., Arimoto, R., and Prospero, J. M.: Air-borne dust fluxes to a deep water sediment trap in the Sargasso Sea, *Global Biogeochemical Cycles*, 12, 311–320, <https://doi.org/10.1029/97GB03368>, 1998.
- Kawamura, K., Hoque, M. Md. M., Bates, T. S., and Quinn, P. K.: Molecular distributions and isotopic compositions of organic aerosols over the western North Atlantic: Dicarboxylic acids, related compounds, sugars, and secondary organic aerosol tracers, *Organic Geochemistry*, 113, 229–238, <https://doi.org/10.1016/j.orggeochem.2017.08.007>, 2017.
- Keene, W. C., Pszenny, A. A. P., Galloway, J. N., and Hawley, M. E.: Sea-salt corrections and interpretation of constituent ratios in marine precipitation, *Journal of Geophysical Research: Atmospheres*, 91, 6647–6658, <https://doi.org/10.1029/JD091iD06p06647>, 1986.
- Keene, W. C., Maring, H., Maben, J. R., Kieber, D. J., Pszenny, A. A. P., Dahl, E. E., Izaguirre, M. A., Davis, A. J., Long, M. S., Zhou, X., Smoydzin, L., and Sander, R.: Chemical and physical characteristics of nascent aerosols produced by bursting bubbles at a model air-sea interface, *Journal of Geophysical Research: Atmospheres*, 112, <https://doi.org/10.1029/2007JD008464>, 2007.
- Keene, W. C., Moody, J. L., Galloway, J. N., Prospero, J. M., Cooper, O. R., Eckhardt, S., and Maben, J. R.: Long-term trends in aerosol and precipitation composition over the western North Atlantic Ocean at Bermuda, *Atmospheric Chemistry and Physics*, 14, 8119–8135, <https://doi.org/10.5194/acp-14-8119-2014>, 2014.
- Kim, Y., Sievering, H., and Boatman, J.: Volume and surface area size distribution, water mass and model fitting of GCE/CASE/WATOX marine aerosols, *Global Biogeochemical Cycles*, 4, 165–177, <https://doi.org/10.1029/GB004i002p00165>, 1990.
- Lin, C. T., Baker, A. R., Jickells, T. D., Kelly, S., and Lesworth, T.: An assessment of the significance of sulphate sources over the Atlantic Ocean based on sulphur isotope data, *Atmospheric Environment*, 62, 615–621, <https://doi.org/10.1016/j.atmosenv.2012.08.052>, 2012.
- Mackey, K., Buck, K., Casey, J., Cid, A., Lomas, M., Sohrin, Y., and Paytan, A.: Phytoplankton responses to atmospheric metal deposition in the coastal and open-ocean Sargasso Sea, *Frontiers in Microbiology*, 3, 2012.

- Merrill, J. T., Moody, J. L., Oltmans, S. J., and Levy II, H.: Meteorological analysis of tropospheric ozone profiles at Bermuda, *Journal of Geophysical Research: Atmospheres*, 101, 29201–29211, <https://doi.org/10.1029/95JD03432>, 1996.
- Miller, J. M. and Harris, J. M.: The flow climatology to Bermuda and its implications for long-range transport, *Atmospheric Environment* (1967), 19, 409–414, [https://doi.org/10.1016/0004-6981\(85\)90162-3](https://doi.org/10.1016/0004-6981(85)90162-3), 1985.
- Milne, P. J., Prados, A. I., Dickerson, R. R., Doddridge, B. G., Riemer, D. D., Zika, R. G., Merrill, J. T., and Moody, J. L.: Nonmethane hydrocarbon mixing ratios in continental outflow air from eastern North America: Export of ozone precursors to Bermuda, *Journal of Geophysical Research: Atmospheres*, 105, 9981–9990, <https://doi.org/10.1029/1999JD901117>, 2000.
- Moody, J. L. and Galloway, J. N.: Quantifying the relationship between atmospheric transport and the chemical composition of precipitation on Bermuda, *Tellus B: Chemical and Physical Meteorology*, 40, 463–479, <https://doi.org/10.3402/tellusb.v40i5.16014>, 1988.
- Moody, J. L., Oltmans, S. J., Levy II, H., and Merrill, J. T.: Transport climatology of tropospheric ozone: Bermuda, 1988–1991, *Journal of Geophysical Research: Atmospheres*, 100, 7179–7194, <https://doi.org/10.1029/94JD02830>, 1995.
- Moody, J. L., Davenport, J. C., Merrill, J. T., Oltmans, S. J., Parrish, D. D., Holloway, J. S., Levy II, H., Forbes, G. L., Trainer, M., and Buhr, M.: Meteorological mechanisms for transporting O<sub>3</sub> over the western North Atlantic Ocean: A case study for August 24–29, 1993, *Journal of Geophysical Research: Atmospheres*, 101, 29213–29227, <https://doi.org/10.1029/96JD00885>, 1996.
- Moody, J. L., Keene, W. C., Cooper, O. R., Voss, K. J., Aryal, R., Eckhardt, S., Holben, B., Maben, J. R., Izaguirre, M. A., and Galloway, J. N.: Flow climatology for physicochemical properties of dichotomous aerosol over the western North Atlantic Ocean at Bermuda, *Atmospheric Chemistry and Physics*, 14, 691–717, <https://doi.org/10.5194/acp-14-691-2014>, 2014.
- Muhs, D. R., Budahn, J. R., Prospero, J. M., Skipp, G., and Herwitz, S. R.: Soil genesis on the island of Bermuda in the Quaternary: The importance of African dust transport and deposition, *Journal of Geophysical Research: Earth Surface*, 117, <https://doi.org/10.1029/2012JF002366>, 2012.
- Oltmans, S. J. and Levy, H.: Seasonal cycle of surface ozone over the western North Atlantic, *Nature*, 358, 392–394, <https://doi.org/10.1038/358392a0>, 1992.
- Oltmans, S. J., Lefohn, A. S., Harris, J. M., Galbally, I., Scheel, H. E., Bodeker, G., Brunke, E., Claude, H., Tarasick, D., Johnson, B. J., Simmonds, P., Shadwick, D., Anlauf, K., Hayden, K., Schmidlin, F., Fujimoto, T., Akagi, K., Meyer, C., Nichol, S., Davies, J., Redondas, A., and Cuevas, E.: Long-term changes in tropospheric ozone, *Atmospheric Environment*, 40, 3156–3173, <https://doi.org/10.1016/j.atmosenv.2006.01.029>, 2006.
- Oltmans, S. J., Lefohn, A. S., Shadwick, D., Harris, J. M., Scheel, H. E., Galbally, I., Tarasick, D. W., Johnson, B. J., Brunke, E.-G., Claude, H., Zeng, G., Nichol, S., Schmidlin, F., Davies, J., Cuevas, E., Redondas, A., Naoe, H., Nakano, T., and Kawasato, T.: Recent tropospheric ozone changes – A pattern dominated by slow or no growth, *Atmospheric Environment*, 67, 331–351, <https://doi.org/10.1016/j.atmosenv.2012.10.057>, 2013.
- Parrish, D. D., Galbally, I. E., Lamarque, J.-F., Naik, V., Horowitz, L., Shindell, D. T., Oltmans, S. J., Derwent, R., Tanimoto, H., Labuschagne, C., and Cupeiro, M.: Seasonal cycles of O<sub>3</sub> in the marine boundary layer: Observation and model simulation comparisons, *Journal of Geophysical Research: Atmospheres*, 121, 538–557, <https://doi.org/10.1002/2015JD024101>, 2016.
- PéTron, G., Granier, C., Khattatov, B., Lamarque, J.-F., Yudin, V., Müller, J.-F., and Gille, J.: Inverse modeling of carbon monoxide surface emissions using Climate Monitoring and Diagnostics Laboratory network observations, *Journal of Geophysical Research (Atmospheres)*, 107, 4761, <https://doi.org/10.1029/2001JD001305>, 2002.
- Piotrowicz, S. R., Fischer, C. J., and Artz, R. S.: Ozone and carbon monoxide over the North Atlantic during a boreal summer, *Global Biogeochemical Cycles*, 4, 215–224, <https://doi.org/10.1029/GB004i002p00215>, 1990.
- Prados, A. I., Dickerson, R. R., Doddridge, B. G., Milne, P. A., Moody, J. L., and Merrill, J. T.: Transport of ozone and pollutants from North America to the North Atlantic Ocean during the 1996 Atmosphere/Ocean Chemistry Experiment (AEROCE) intensive, *Journal of Geophysical Research: Atmospheres*, 104, 26219–26233, <https://doi.org/10.1029/1999JD900444>, 1999.

Ray, J. D., Van Valin, C. C., Luria, M., and Boatman, J. F.: Oxidants in the marine troposphere: H<sub>2</sub>O<sub>2</sub> and O<sub>3</sub> over the western Atlantic Ocean, *Global Biogeochemical Cycles*, 4, 201–214, <https://doi.org/10.1029/GB004i002p00201>, 1990.

Saikawa, E., Prinn, R. G., Dlugokencky, E., Ishijima, K., Dutton, G. S., Hall, B. D., Langenfelds, R., Tohjima, Y., Machida, T., Manizza, M., Rigby, M., O'Doherty, S., Patra, P. K., Harth, C. M., Weiss, R. F., Krummel, P. B., van der Schoot, M., Fraser, P. J., Steele, L. P., Aoki, S., Nakazawa, T., and Elkins, J. W.: Global and regional emissions estimates for N<sub>2</sub>O, *Atmospheric Chemistry and Physics*, 14, 4617–4641, <https://doi.org/10.5194/acp-14-4617-2014>, 2014.

Savoie, D. L., Arimoto, R., Keene, W. C., Prospero, J. M., Duce, R. A., and Galloway, J. N.: Marine biogenic and anthropogenic contributions to non-sea-salt sulfate in the marine boundary layer over the North Atlantic Ocean, *Journal of Geophysical Research: Atmospheres*, 107, AAC 3-1-AAC 3-21, <https://doi.org/10.1029/2001JD000970>, 2002.

Sholkovitz, E. R. and Sedwick, P. N.: Open-ocean deployment of a buoy-mounted aerosol sampler on the Bermuda Testbed Mooring: Aerosol iron and sea salt over the Sargasso Sea, *Deep Sea Research Part I: Oceanographic Research Papers*, 53, 547–560, <https://doi.org/10.1016/j.dsr.2005.12.002>, 2006.

Sholkovitz, E. R., Sedwick, P. N., and Church, T. M.: Influence of anthropogenic combustion emissions on the deposition of soluble aerosol iron to the ocean: Empirical estimates for island sites in the North Atlantic, *Geochimica et Cosmochimica Acta*, 73, 3981–4003, <https://doi.org/10.1016/j.gca.2009.04.029>, 2009.

Sievering, H., Ennis, G., Gorman, E., and Nagamoto, C.: Size distributions and statistical analysis of nitrate, excess sulfate, and chloride deficit in the marine boundary layer during GCE/CASE/WATOX, *Global Biogeochemical Cycles*, 4, 395–405, <https://doi.org/10.1029/GB004i004p00395>, 1990.

Sievering, H., Boatman, J., Galloway, J., Keene, W., Kim, Y., Luria, M., and Ray, J.: Heterogeneous sulfur conversion in sea-salt aerosol particles: the role of aerosol water content and size distribution, *Atmospheric Environment. Part A. General Topics*, 25, 1479–1487, [https://doi.org/10.1016/0960-1686\(91\)90007-T](https://doi.org/10.1016/0960-1686(91)90007-T), 1991.

Smirnov, A., Holben, B. N., Slutsker, I., Welton, E. J., and Formenti, P.: Optical properties of Saharan dust during ACE 2, *Journal of Geophysical Research: Atmospheres*, 103, 28079–28092, <https://doi.org/10.1029/98JD01930>, 1998.

Smirnov, A., Holben, B. N., Dubovik, O., O'Neill, N. T., Remer, L. A., Eck, T. F., Slutsker, I., and Savoie, D.: Measurement of atmospheric optical parameters on U.S. Atlantic coast sites, ships, and Bermuda during TARFOX, *Journal of Geophysical Research: Atmospheres*, 105, 9887–9901, <https://doi.org/10.1029/1999JD901067>, 2000.

Smirnov, A., Holben, B. N., Dubovik, O., Frouin, R., Eck, T. F., and Slutsker, I.: Maritime component in aerosol optical models derived from Aerosol Robotic Network data, *Journal of Geophysical Research: Atmospheres*, 108, AAC 14-1-AAC 14-11, <https://doi.org/10.1029/2002JD002701>, 2003.

Tanré, D., Remer, L. A., Kaufman, Y. J., Mattoo, S., Hobbs, P. V., Livingston, J. M., Russell, P. B., and Smirnov, A.: Retrieval of aerosol optical thickness and size distribution over ocean from the MODIS airborne simulator during TARFOX, *Journal of Geophysical Research: Atmospheres*, 104, 2261–2278, <https://doi.org/10.1029/1998JD200077>, 1999.

Thompson, R. L., Chevallier, F., Crotwell, A. M., Dutton, G., Langenfelds, R. L., Prinn, R. G., Weiss, R. F., Tohjima, Y., Nakazawa, T., Krummel, P. B., Steele, L. P., Fraser, P., O'Doherty, S., Ishijima, K., and Aoki, S.: Nitrous oxide emissions 1999 to 2009 from a global atmospheric inversion, *Atmospheric Chemistry and Physics*, 14, 1801–1817, <https://doi.org/10.5194/acp-14-1801-2014>, 2014.

Todd, D. L., Keene, W. C., Moody, J. L., Maring, H., and Galloway, J. N.: Effects of wet deposition on optical properties of the atmosphere over Bermuda and Barbados, *Journal of Geophysical Research: Atmospheres*, 108, <https://doi.org/10.1029/2001JD001084>, 2003.

Tomza, U., Arimoto, R., and Ray, B.: Color-related differences in the chemical composition of aerosol-laden filters, *Atmospheric Environment - ATMOS ENVIRON*, 35, 1703–1709, [https://doi.org/10.1016/S1352-2310\(00\)00462-3](https://doi.org/10.1016/S1352-2310(00)00462-3), 2001.

Turekian, V. C., Macko, S. A., and Keene, W. C.: Application of stable sulfur isotopes to differentiate sources of size-resolved Particulate sulfate in polluted marine air at Bermuda during spring, *Geophysical Research Letters*, 28, 1491–1494, <https://doi.org/10.1029/2000GL012296>, 2001.

Turekian, V. C., Macko, S. A., and Keene, W. C.: Concentrations, isotopic compositions, and sources of size-resolved, particulate organic carbon and oxalate in near-surface marine air at Bermuda during spring, *Journal of Geophysical Research: Atmospheres*, 108, <https://doi.org/10.1029/2002JD002053>, 2003.

Volpe, C. and Spivack, A. J.: Stable chlorine isotopic composition of marine aerosol particles in the western Atlantic Ocean, *Geophysical Research Letters*, 21, 1161–1164, <https://doi.org/10.1029/94GL01164>, 1994.

Witek, M. L., Garay, M. J., Diner, D. J., and Smirnov, A.: Aerosol optical depths over oceans: A view from MISR retrievals and collocated MAN and AERONET in situ observations, *Journal of Geophysical Research: Atmospheres*, 118, 12,620–12,633, <https://doi.org/10.1002/2013JD020393>, 2013.

Wolff, G. T., Ruthkosky, M. S., Stroup, D. P., Korsog, P. E., Ferman, M. A., Wendel, G. J., and Stedman, D. H.: Measurements of SO<sub>x</sub>, NO<sub>x</sub> and aerosol species on Bermuda, *Atmospheric Environment* (1967), 20, 1229–1239, [https://doi.org/10.1016/0004-6981\(86\)90158-7](https://doi.org/10.1016/0004-6981(86)90158-7), 1986.
